1 **ZBTB38 is dispensable for hematopoiesis and antibody responses.**

2

3 Rachel Wong<sup>1,2</sup> and Deepta Bhattacharya<sup>2\*</sup>

4

5 <sup>1</sup>Division of Biological and Biomedical Sciences, Washington University in St. Louis,  
6 Saint Louis, Missouri, 63110, USA

7

8 <sup>2</sup>Department of Immunobiology, University of Arizona, Tucson, AZ 85724, USA

9

10

11 \* Corresponding author; Email: [deeptab@email.arizona.edu](mailto:deeptab@email.arizona.edu)

12

13 **Abstract**

14           Members of the broad complex, tram track, bric-a-brac and zinc finger (BTB-ZF)  
15 family of transcription factors, such as BCL-6, ZBTB20, and ZBTB32, regulate antigen-  
16 specific B cell differentiation, plasma cell longevity, and the duration of antibody  
17 production. We found that ZBTB38, a different member of the BTB-ZF family that binds  
18 methylated DNA at CpG motifs, is highly expressed by germinal center B cells and  
19 plasma cells. To define the functional role of ZBTB38 in B cell responses, we generated  
20 mice conditionally deficient in this transcription factor. Germinal center B cells lacking  
21 ZBTB38 dysregulated very few genes relative to wild-type and heterozygous littermate  
22 controls. Accordingly, mice with hematopoietic-specific deletion of *Zbtb38* showed  
23 normal germinal center B cell numbers and antibody responses following immunization  
24 with hapten-protein conjugates. Memory B cells from these animals functioned normally  
25 in secondary recall responses. Despite expression of ZBTB38 in hematopoietic stem  
26 cells, progenitors and mature myeloid and lymphoid lineages were also present in  
27 normal numbers in mutant mice. These data demonstrate that ZBTB38 is dispensable  
28 for hematopoiesis and antibody responses. These conditional knockout mice may  
29 instead be useful in defining the functional importance of ZBTB38 in other cell types and  
30 contexts.

31

32

33

34

35

## 36 **Introduction**

37           Antibody responses following infections or vaccinations are initiated by a series  
38 of B cell activation steps and fate decisions [1]. Upon recognition of cognate antigens  
39 and other stimulatory signals, B cells grow in size, express a panel of activation  
40 markers, begin to proliferate, and a subset undergoes immunoglobulin isotype-switching  
41 [2]. In T cell-dependent responses, B cells then differentiate either into antibody-  
42 secreting plasma cells or into germinal center B cells. Germinal centers are the sites in  
43 which somatic hypermutation and affinity maturation occur and are under substantial  
44 replicative and DNA damage-induced stress. Germinal centers eventually produce long-  
45 lived plasma cells (LLPCs) and memory B cells (MBCs), which have distinct antigen  
46 specificities and mediate different aspects of immunity [3]. LLPCs constitutively secrete  
47 antibodies and are important for providing protection against re-infection by the same  
48 pathogen. Memory B cells, on the other hand, can only provide protection after re-  
49 activation by a cognate antigen through rapid differentiation into plasma cells. Recent  
50 studies have identified the broad complex, tram track, bric-a-brac and zinc finger (BTB-  
51 ZF) family of transcription factors as key regulators in B cell development. BTB-ZF  
52 family members bind DNA through its C-terminal zinc finger domains and recruit SMRT  
53 co-repressors and histone deacetylases to N-terminal BTB/POZ domains [4-8]. Family  
54 members that regulate distinct aspects of B cell-mediated immunity include BCL-6,  
55 ZBTB20, and ZBTB32. BCL-6 is important for germinal center (GC) formation [9],  
56 ZBTB20 promotes plasma cell lifespan and durable immunity in an adjuvant dependent  
57 manner [10, 11], and ZBTB32 restricts memory B cell recall responses [12, 13]. Other

58 as-yet uncharacterized BTB-POZ members may regulate different aspects of B cell  
59 responses [4].

60 ZBTB38, also known as CIBZ (CtBP-interacting BTB zinc finger protein), is  
61 another member of the BTB-ZF family and can function either as a transcriptional  
62 repressor or activator [14]. ZBTB38-mediated transcriptional regulation occurs by  
63 binding primarily to specific methylated CpG sequences and recruiting repressors or  
64 activators [15-19]. ZBTB38 has been shown to repress overall transcription by inhibiting  
65 expression of MCM10, a component of the pre-replication complex [20]. Additionally,  
66 ZBTB38 can, directly or indirectly, regulate cell cycle progression, cellular differentiation,  
67 and apoptosis [21-25]. Here, we demonstrate that, despite high levels of expression in  
68 germinal center B lymphocytes and plasma cells, ZBTB38 deficiency does not impair  
69 primary or secondary antibody responses to T cell-dependent model immunogens.

70

71

## 72 **Materials and Methods**

73

74 **Ethics statement.** All procedures in this study were specifically approved and carried  
75 out in accordance with the guidelines set forth by the Institutional Animal Care and Use  
76 Committee at Washington University (approval 20140030) and at the University of  
77 Arizona (approval 17-266). Euthanasia was performed by administering carbon dioxide  
78 at 1.5L/minute into a 7L chamber until 1 minute after respiration ceased. After this point,  
79 cervical dislocation was performed to ensure death.

80

81 **Mice.** All mice were housed and bred in pathogen-free facilities. C57BL6/N mice were  
82 obtained from the National Cancer Institute. B6.Cg-*Igh<sup>a</sup>Thy1<sup>a</sup>Gpi1<sup>a</sup>* (*IgH<sup>a</sup>*) mice were  
83 obtained from Charles River Laboratories. *Zbtb38<sup>f/+</sup>* mice were generated by injecting  
84 C57Bl6/J pronuclear zygotes with ribonucleoparticles of Cas9 protein and guide RNAs  
85 targeting sites flanking exon 3 of *Zbtb38*, alongside oligonucleotide donors as  
86 homologous recombination donors spanning these same gRNA sites. Oligonucleotide  
87 substrates contained loxP sites to interrupt gRNA target sites to prevent Cas9 re-cutting  
88 after successful recombination. A single successful founder (out of 33 tested) was  
89 identified by PCR and then bred to C57Bl6/N mice for germline transmission. Mice have  
90 been maintained by backcrossing to C57Bl6/N animals. Animals will be made available  
91 at the Mutant Mouse Resource and Research Centers upon publication of this  
92 manuscript (B6N.B6J-*Zbtb38em1Dbhat*/Mmucd, Strain ID 66871). ZBTB38 f/f mice  
93 were crossed to CMV-Cre (Jackson Laboratory, stock no. 006054) or VavCre (Jackson  
94 Laboratory, stock no. 008610) and maintained as ZBTB38 f/f or ZBTB38 x CMV- or  
95 Vav-Cre where littermates were used as controls. The following primers were used to

96 confirm recombination of the targeting plasmid: SP55.mZbtb38.5'genomic.F2 5'-  
97 CCAGGGATTCAGTCCTCAGCA-3', SP55.mZbtb38.3'genomic.R2 5'-  
98 GCCTACCCCAAACCACACTAA-3'. The following primers were used for genotyping  
99 the *Zbtb38* allele: 5'LoxP forward 5'- TCTGAGTTCAAGGCCAGCTT-3', 5'LoxP reverse  
100 5'- TCTCCAAGCAGAAAGGGTGT-3', and 3'LoxP reverse 5'-  
101 GGGTCGTTAGAGGATTCAGC-3'.

102

103 **Immunizations.** Mice were immunized intraperitoneally with 100 µg NP-OVA  
104 (Biosearch), adjuvanted with Alhydrogel (Invivogen). NP-APC used for staining was  
105 made by conjugating allophycocyanin (Sigma-Aldrich) with 4-hydroxy-3-  
106 nitrophenylacetyl-O-succinimide ester (Biosearch Technologies).

107

108 **RNA extraction, cDNA synthesis, and qRT-PCR.** Total RNA was extracted with  
109 TRIzol (Life technologies) and cDNA synthesized using Superscript III Reverse  
110 transcription kit with random hexamers (Life Technologies) according to manufacturer's  
111 instructions. qRT-PCR was performed using SYBR Green PCR master mix (Applied  
112 Biosystems) on a Prism 7000 Sequence Detection System (Applied Biosystems). The  
113 primers used for *Zbtb38* are: forward 5'- AGAACCAAGGATTTCCGAGTG-3' and  
114 reverse 5'-GATGGAGAGTACTGTGTCAGT-3'. *Zbtb38* transcript levels were  
115 normalized to 18S ribosomal RNA, forward 5'-CGGCTACCACATCCAAGGAA-3' and  
116 reverse 5'-GCTGGAATTACCGCGGCT-3' [26].

117

118 **RNA-sequencing.** RNA from germinal center B cells was extracted with Macherey-  
119 Nagel Nucleospin XS kits. cDNA libraries were prepared by Novogene using SmartSeq  
120 v4 kits (Takara) and processed for paired-end PE150 RNA-sequencing on an Illumina  
121 HiSeq 4000 lane. For visualization of ZBTB38 transcripts, fastq files were mapped and  
122 aligned to the mm10 genome using HiSat2 and displayed using IgV [27, 28]. For  
123 quantification of gene expression differences, fastq files were mapped using vM17  
124 annotation files from Gencode and transcript abundances were quantified by Salmon  
125 [29]. Differentially-expressed genes quantified by DESeq2 [30]. Volcano plots were  
126 displayed using Prism software (GraphPad). Data have been deposited to NCBI GEO  
127 and await an accession number.

128

129 **ELISA.** ELISA plates (9018, Corning) were coated overnight at 4°C in 0.1 M sodium  
130 bicarbonate buffer, pH 9.5 containing 5 ug/mL of NP<sub>16</sub>- or NP<sub>4</sub>-BSA (BioResearch  
131 Technologies). All other incubation steps were performed at room temperature for 1  
132 hour. Wash steps were performed between each step using PBS + 0.05% Tween-20.  
133 Plates were blocked with PBS + 2% BSA followed by serial dilutions of serum. Serum  
134 was probed with 0.1 ug/mL of biotinylated anti-mouse IgG (715-065-151, Jackson  
135 ImmunoResearch Laboratories) and then detected with streptavidin conjugated  
136 horseradish peroxidase (554066, BD biosciences). Plates were developed using TMB  
137 (Dako, S1599) and neutralized with 2N H<sub>2</sub>SO<sub>4</sub>. Optical density (OD) values were  
138 measured at 450 nm. Serum endpoint titer was defined as the inverse dilution factor  
139 that is three standard deviations above background using one-phase decay  
140 measurements and Prism software (GraphPad Software).

141  
142 **Adoptive transfer for recall responses.** Splenocytes from NP-immunized *ZBTB38<sup>ff</sup>* or  
143 *ZBTB38<sup>ff</sup>* x *VavCre* mice were isolated and processed into single cell suspension.  
144 erythrocytes lysed using an ammonium chloride-potassium solution, and lymphocytes  
145 isolated by using a Hisopaque-1119 (Sigma-Aldrich) density gradient. Cells were  
146 washed twice prior to transfer. 10% of cells were retained for cellular analysis whereas  
147 the remaining 90% of cells were transferred into one non-irradiated *IgH<sup>α</sup>* recipient mice  
148 by intravenous injection. A recall response was elicited by intravenously challenging  
149 mice with soluble NP-OVA 24 hours later.

150  
151 **Flow cytometry.** Single cell suspensions were prepared from bone marrow or spleen,  
152 erythrocytes lysed using an ammonium chloride-potassium solution, and lymphocytes  
153 isolated by using a Hisopaque-1119 (Sigma-Aldrich) density gradient. Cells were  
154 resuspended in PBS with 5% adult bovine serum and 2 mM EDTA prior to staining with  
155 antibodies and NP-APC. The following antibodies were purchased from Biolegend: 6D5  
156 (CD19)-Alexa Fluor 700; GL7-FITC; 281-2 (CD138)-PE; RMM-1 (IgM)-APC; 11-26c.2a  
157 (IgD)-PerCP-Cy5.5 or -Brilliant Violet 605; 16-10A1 (CD80)-PE; RA3-6B2 (B220)-FITC,  
158 -Pacific Blue, or APC-Cy7; PO3 (CD86)-FITC; PK136 (NK-1.1)-PerCP-Cy5.5; M1/70  
159 (CD11b)-Pacific Blue; HK1.4 (Ly-6C)-Brilliant Violet 510; 1A8 (Ly-6G)-Brilliant Violet  
160 605; A7R34 (IL-7R)-Brilliant Violet 421; and E13-16.7 (Ly-6A/E)-PE. The following  
161 antibodies were purchased from eBioscience: 11/41 (IgM)-PerCP-e710; 11-26c (IgD)-  
162 FITC; 2B11 (CXCR4)-PerCP-e710; 2B8 (c-Kit)-PE-Cy7; and LG.7F9 (CD27)-APC. The



163 following antibodies were purchased from BD Pharmingen: 53-6.7 (CD8a)-PE; RM4-5  
164 (CD4)-PE-Cy7; A2F10.1 (CD135)-PE-CF594; and 93 (CD16/CD32)-PerCP-Cy5.5.  
165 Cells were stained on ice for 20 minutes. Germinal center B cells were enriched by  
166 staining cells with GL7-PE followed with anti-PE magnetic beads (0.5  $\mu$ L/ $10^7$  cells,  
167 Miltenyi Biotec). Positive enrichment of GL7-expressing cells was performed using  
168 MACS LS columns (Miltenyi Biotec).

169

170

171 **Results**

172 **ZBTB38 is highly expressed in B cell subsets.**

173 RNA-sequencing studies have reported expression of ZBTB38 in plasma cells  
174 [31]. To look more broadly across hematopoietic lineages, ZBTB38 gene expression in  
175 multiple cell types was first analyzed using available RNA-sequencing data assembled  
176 by the ImmGen Consortium [32]. A subset of cell types expressing DESeq2-normalized  
177 ZBTB38 counts greater than 800 are shown in **Figure 1A** [30]. High expression of  
178 ZBTB38 was observed in splenic plasma cells and plasmablasts (PC and PB), and in  
179 both light zone and dark zone germinal center B cells (LZ and DZ, **Figure 1A**). To  
180 confirm these data, wild-type mice were immunized with alhydrogel-adjuvanted 4-  
181 hydroxy-3-nitrophenyl-acetyl (NP) conjugated to ovalbumin (OVA) and naïve B cells  
182 (CD19<sup>+</sup>CD138<sup>-</sup>), NP-specific dark (CXCR4<sup>+</sup>) and light zone (CD86<sup>+</sup>) GC B cells  
183 (CD19<sup>+</sup>GL7<sup>+</sup>IgD<sup>-</sup>), and NP-specific splenic plasma cells (CD138<sup>+</sup>) were sorted 11 days  
184 after immunization [33]. RNA was extracted from sorted cells and quantitative RT-PCR  
185 performed to quantify ZBTB38 transcript levels. GC B cells and splenic plasma cells  
186 contained 9- and 3-fold, respectively, higher expression of ZBTB38 compared to naïve  
187 B cells (**Figure 1B, S1**). No differences in ZBTB38 expression were observed between  
188 light and dark zone GC B cells.

189 **Figure 1. ZBTB38 is highly expressed by specific hematopoietic lineages. (A)**

190 ZBTB38 expression values in select cell subsets with DESeq2 count values over 800  
191 were extracted from ImmGen's RNA-seq SKYLINE and grouped based on cell type. **(B)**  
192 Naïve B cells, antigen-specific (NP<sup>+</sup>) dark (DZ, CXCR4<sup>+</sup>) and light (LZ, CD86<sup>+</sup>) zone  
193 germinal center B cells (GC, CD19<sup>+</sup>GL7<sup>+</sup>IgD<sup>-</sup>), and splenic plasma cells (SpPC,

194 CD138<sup>+</sup>) were sorted 11 days after immunization of C57BL/6 mice with NP-OVA in  
195 alhydrogel, and *Zbtb38* RNA levels quantified by quantitative RT-PCR. ZBTB38  
196 expression was first normalized to 18S expression level followed by normalization to  
197 naïve B cells. Gating strategies are shown in S1 Fig. Mean  $\pm$  SEM are shown; each  
198 symbol represents an individual mouse.

### 199 **Generation and validation of ZBTB38 conditional knockout mice.**

200 To assess the functional role of ZBTB38 *in vivo*, we generated *Zbtb38* floxed  
201 mice by targeting exon 3 (**Figure 2A**). This terminal exon contains the entire protein-  
202 coding sequence of ZBTB38. Single-stranded oligonucleotides containing loxP sites and  
203 flanking sequences of exon 3 of *Zbtb38* were microinjected alongside Cas9/guideRNA  
204 ribonucleoparticles into C57Bl6/J zygotes. gRNA sites were designed to flank the  
205 endogenous *Zbtb38* exon 3 and be disrupted upon homologous recombination with the  
206 targeting oligonucleotides. NdeI and EcoRI restriction sites were included in the  
207 oligonucleotides near the 5' LoxP and 3' LoxP sites to screen for successful  
208 homologous recombination of the targeting construct. Correct targeting of exon 3 was  
209 confirmed by PCR and restriction enzyme digestions (**Figure 2B**). Wild-type, targeted,  
210 and *Zbtb38*-deleted mice were distinguished using a set of three PCR primers flanking  
211 the 5' and 3' LoxP sequences (**Figure 2C**). To confirm deletion of *Zbtb38* exon 3 at the  
212 genomic level, *Zbtb38* f/f mice were crossed to mice expressing CMV-Cre to obtain  
213 germline ZBTB38 deletion. Tail genomic DNA from *Zbtb38* f/f x CMV-Cre was amplified  
214 and deletion was confirmed by a 4 kb reduction in PCR amplicon size (**Figure 2D**).  
215 Despite genome-wide association studies linking polymorphisms in the *Zbtb38* locus to  
216 human height [34-36], no differences were observed in the size of ZBTB38 deficient vs.

217 wild-type littermates, and animals were born in expected Mendelian ratios (data not  
218 shown).

219 **Figure 2. *Zbtb38* targeting strategy and confirmation of deletion.**

220 **(A)** Targeting strategy for exon 3 of *Zbtb38*. Guide RNA (gRNA) sites and targeting  
221 single-stranded oligonucleotides containing NdeI and EcoRI restriction sites were  
222 introduced to allow for screening of homologous recombination. **(B)** PCR strategy for  
223 exon 3 to confirm correct targeting. Lane 1 shows undigested PCR product, lane 2  
224 shows NdeI digest (expected band sizes of 5.8 kb and 445 bp), lane 3 shows EcoRI  
225 digest (expected band sizes of 2.6 kb, 2 kb, and 1.6 kb), and lane 4 shows NdeI and  
226 EcoRI double digest (expected band sizes of 445 bp, 2.1 kb, 2 kb, and 1.6 kb). **(C)**  
227 Genotyping strategy and results to identify WT, floxed, or deleted *Zbtb38* alleles.  
228 **(D)** PCR confirming *Zbtb38* deletion upon Cre expression. Primers used are identical to  
229 those used to amplify the genomic DNA as in **(B)**.

230         Given the high expression of ZBTB38 in blood lineages, we crossed *Zbtb38* f/f  
231 mice to VavCre mice (*Zbtb38* f/f x VavCre, ZBTB38 KO), which express Cre  
232 recombinase primarily in hematopoietic cells [37]. To confirm loss of ZBTB38  
233 expression in this system, we performed RNA-seq on germinal center B cells isolated 2  
234 weeks after immunization with NP-OVA. After mapping reads and aligning to the mouse  
235 genome, we observed that transcripts within the floxed exon 3 were completely  
236 abrogated in ZBTB38 KO mice, whereas intermediate levels were observed in *Zbtb38*  
237 f/+ x VavCre heterozygous littermates (**Figure 3A**) relative to *Zbtb38* f/f controls that  
238 lack Cre recombinase (ZBTB38 WT). We next used Salmon to quantify transcript

239 abundances and DESeq2 to identify genes differentially expressed between ZBTB38-  
240 deficient mice and controls [29, 30]. Other than ZBTB38 itself, very few genes were  
241 dysregulated in ZBTB38-deficient cells (**Figure 3B**). To increase statistical power, we  
242 compared ZBTB38-deficient samples to both wild-type and heterozygous controls.  
243 Again, very few differences were observed (**Figure 3C**). Pathway analysis failed to  
244 reveal any transcriptional programs that were over- or under-represented in ZBTB38-  
245 deficient germinal center B cells (data not shown).

246 **Figure 3. ZBTB38 deficiency minimally impacts gene expression in germinal**  
247 **center B cells. (A)** RNA-seq reads across exons 2-3 of *Zbtb38*. Paired-end RNA-seq of  
248 antigen specific (NP<sup>+</sup>) germinal center B cells (CD19<sup>+</sup>GL7<sup>+</sup>IgD<sup>-</sup>) from *Zbtb38*<sup>fl/fl</sup> (ZBTB38  
249 WT), *Zbtb38*<sup>+/-</sup> x *Vav-Cre* (ZBTB38 HET), and *Zbtb38*<sup>fl/fl</sup> x *Vav-Cre* (ZBTB38 KO) mice  
250 were aligned to the mm10 mouse genome and shown using IgV browser. **(B)** Volcano  
251 plot depicting differential gene expression between ZBTB38 WT (n=2) and ZBTB38 KO  
252 (n=6) mice. **(C)** Differential gene expression between ZBTB38 and ZBTB38 HET (n=4 in  
253 total) and ZBTB38 KO (n=6).

#### 254 **ZBTB38 deficiency does not impair B cell responses.**

255 Deficiencies in two other BTB-ZF factors, ZBTB20 and ZBTB32, cause profound  
256 effects on plasma cell lifespan despite modest changes in gene expression [10-13].  
257 Therefore, to determine if ZBTB38 has a functional role in primary B cell responses, we  
258 first examined GC reactions. We immunized ZBTB38 WT and KO mice with NP-OVA  
259 and quantified the frequency of NP-specific GC B cells 2 weeks later, which  
260 corresponds with peak GC reactions [38]. We observed no differences in the

261 frequencies of NP-specific GC B cells between ZBTB38 WT and KO mice (**Figure 4A**).  
262 NP-specific serum antibodies were also similar between ZBTB38 WT and KO mice at all  
263 time points measured (**Figure 4B**). To specifically quantify the level of high affinity  
264 antibodies in the serum by ELISA, low density antigen (NP<sub>4</sub>) was used to probe for  
265 antibody binding. Low density NP (NP<sub>4</sub>) is used to capture antibodies with slow off-  
266 rates, which is correlated with antigen high affinity. This contrasts with high density NP  
267 (NP<sub>16</sub>), which can capture antibodies with faster off rates due to the increased  
268 concentration of antigen. Unlike the total levels of NP-specific antibodies over time,  
269 which plateaued two weeks after immunization, the concentration of high affinity  
270 antibodies increased steadily over time and plateaued four weeks after immunization  
271 (**Figure 4C**). No difference in the quantity of high affinity antibodies was observed  
272 between ZBTB38 WT and KO mice (**Figure 4C**). Furthermore, the extent of affinity  
273 maturation, quantified as the ratio of NP<sub>4</sub> to NP<sub>16</sub> endpoint titers, was similar between  
274 ZBTB38 WT and KO mice (**Figure 4D**).

275 **Figure 4. ZBTB38 is dispensable for primary B cell responses.** (A) ZBTB38 WT and  
276 KO mice were immunized with NP-OVA and the frequency of NP-specific germinal  
277 center B cells two weeks post immunization was quantified by flow cytometry. Mean ±  
278 SEM are shown; each symbol represents an individual mouse. Statistical significance  
279 was calculated by unpaired student's two-tailed t-test; n.s. = not significant (p > 0.05).  
280 (B, C) ZBTB38 WT and KO mice were immunized with NP-OVA and total serum  
281 antibody titers (B) and high affinity serum antibody titers (C) to NP were quantified by  
282 ELISA. Endpoint titers are calculated as the reciprocal serum dilution that was three  
283 standard deviations above background. Mean ± SEM are shown; each symbol

284 represents an individual mouse. Statistical significance was calculated by Mann-  
285 Whitney test; n.s. = not significant ( $p > 0.05$ ). **(D)** Affinity maturation of the antibodies  
286 was calculated as the ratio of endpoint titers to NP4 : NP16 and plotted at each time  
287 point for ZBTB38 WT and ZBTB38 KO mice. Mean  $\pm$  SEM are shown; each symbol  
288 represents an individual mouse. **(E)** The frequency of NP-specific long-lived plasma  
289 cells was calculated by flow cytometry. Long-lived plasma cells were analyzed 8 weeks  
290 post-NP immunization. Gating strategies are shown in S2 Fig. Mean  $\pm$  SEM are shown;  
291 each symbol represents an individual mouse. Statistical significance was calculated by  
292 unpaired student's two-tailed t-test; n.s. = not significant ( $p > 0.05$ ).

293 Possible explanations for the similar serum antibody levels in ZBTB38 WT and  
294 KO mice include similar frequencies of antigen-specific LLPCs or compensatory  
295 increased antibody secretion from fewer LLPCs. To differentiate between these two  
296 possibilities, the frequency of NP-specific LLPCs was quantified by flow cytometry 8  
297 weeks after alhydrogel-adjuvanted NP-OVA immunization of ZBTB38 WT and KO mice.  
298 The frequency of NP-specific LLPCs was similar between ZBTB38 WT and KO mice  
299 **(Figure 4E, S2)**. These data demonstrate that ZBTB38 is dispensable for primary  
300 antibody responses to hapten-protein antigens.

301 To determine if ZBTB38 expression is required for secondary responses and  
302 MBC differentiation, the frequency of NP-specific memory B cells (CD19<sup>+</sup>GL7-IgM<sup>-</sup>IgD<sup>-</sup>  
303 CD80<sup>+</sup>CCR6<sup>+</sup>) was quantified in ZBTB38 WT and KO mice 8 weeks after immunization  
304 with alhydrogel-adjuvanted NP-OVA. No difference in the frequency of NP-specific  
305 MBCs was observed **(Figure 5A, S3)**. To assess MBC function, splenocytes from  
306 ZBTB38 WT and KO mice were adoptively transferred into allotype-distinct naïve IgH<sup>a</sup>

307 recipients and mice challenged with soluble NP-OVA 24 hours later. Donor IgH<sup>b</sup> NP-  
308 specific antibodies originating from ZBTB38 WT and KO mice were tracked over time.  
309 NP-specific antibody titers were not altered by ZBTB38 deficiency (**Figure 5B**). Thus,  
310 ZBTB38 is also dispensable for secondary B cell responses.

311 **Figure 5. Memory B cell responses do not require ZBTB38.** (A) The frequency of  
312 NP-specific memory B cells (CD19<sup>+</sup>GL7-IgM-IgD-CD80<sup>+</sup>CCR6<sup>+</sup>) was quantified by flow  
313 cytometry in ZBTB38 WT and KO mice 8 weeks after NP-OVA immunization. Gating  
314 strategies are shown in S3 Fig. Mean  $\pm$  SEM are shown; each symbol represents an  
315 individual mouse. Statistical significance was calculated by unpaired student's two-tailed  
316 t-test; n.s. = not significant ( $p > 0.05$ ). (B) Splenocytes from ZBTB38 WT and ZBTB38  
317 KO mice were adoptively transferred into IgHa naïve hosts and challenged with soluble  
318 NP-OVA one day after transfer. Donor (IgH<sup>b</sup>) antibody responses were calculated as  
319 the endpoint titer against high density NP. Mean  $\pm$  SEM are shown; each symbol  
320 represents an individual mouse. Statistical significance was calculated by Mann-  
321 Whitney test; n.s. = not significant ( $p > 0.05$ ).

322

### 323 **ZBTB38 deficiency does not alter the development of hematopoietic cells**

324       Given ZBTB38 expression in hematopoietic progenitors (**Figure 1A**), we next  
325 assessed if ZBTB38 deficiency alters the development of lymphoid and/or myeloid  
326 lineages by quantifying the frequencies of different cell populations by flow cytometry.  
327 We first focused on hematopoietic stem cells (HSCs, cKit<sup>+</sup>Sca1<sup>+</sup>Fli2-CD27<sup>+</sup>) and  
328 progenitors with varying degrees of lineage commitment in the bone marrow [39]. HSCs



329 differentiate into multipotent progenitors (MPPs, cKit<sup>+</sup>Sca1<sup>+</sup>Flk2<sup>+</sup>CD27<sup>+</sup>) that can give  
330 rise to both the myeloid and lymphoid lineages. MPPs can then differentiate into  
331 common myeloid progenitors (CMPs, cKit<sup>+</sup>Sca1<sup>-</sup>Flk2<sup>+</sup>FcγR<sup>-</sup>) or common lymphoid  
332 progenitors (CLPs, cKit<sup>-/lo</sup>Sca1<sup>-</sup>CD27<sup>+</sup>FcγR<sup>-</sup>Flk2<sup>+</sup>IL7Rα<sup>+</sup>) [40, 41]. CLPs give rise to B, T,  
333 natural killer (NK), and innate like cells (ILCs). CMPs give rise to basophils, eosinophils,  
334 mast cells, dendritic cells as well as granulocyte monocyte progenitors (GMPs,  
335 cKit<sup>+</sup>Sca1<sup>-</sup>Flk2<sup>-</sup>FcγR<sup>+</sup>) [41]. GMPs can then give rise to neutrophils and monocytes. We  
336 identified no statistically significant differences in the frequencies of these progenitor  
337 populations between ZBTB38 WT and KO mice (**Figure 6A, S4**).

338 **Figure 6. ZBTB38 deficiency does not impact hematopoietic development of**  
339 **maintenance.** (A) Frequencies of hematopoietic stem cells (HSCs, cKit<sup>+</sup>Sca1<sup>+</sup>Flk2<sup>-</sup>  
340 CD27<sup>+</sup>), multi-potent progenitors (MPPs, cKit<sup>+</sup>Sca1<sup>+</sup>Flk2<sup>+</sup>CD27<sup>+</sup>), common myeloid  
341 progenitors (CMPs, cKit<sup>+</sup>Sca1<sup>-</sup>Flk2<sup>+</sup>FcγR<sup>-</sup>), granulocyte monocyte progenitors (GMPs,  
342 cKit<sup>+</sup>Sca1<sup>-</sup>Flk2<sup>-</sup>FcγR<sup>+</sup>), and common lymphoid progenitors (CLPs, cKit<sup>-/lo</sup>Sca1<sup>-</sup>  
343 CD27<sup>+</sup>FcγR<sup>-</sup>Flk2<sup>+</sup>IL7Rα<sup>+</sup>) in the bone marrow from ZBTB38 WT and KO mice were  
344 quantified by flow cytometry. Gating strategies are shown in S4 Fig. Mean ± SEM are  
345 shown; each symbol represents an individual mouse. (B) Frequencies of B cells  
346 (B220<sup>+</sup>), natural killer (NK, NK1.1<sup>+</sup>) cells, CD4<sup>+</sup> and CD8<sup>+</sup> T cells (B220<sup>-</sup>CD11b<sup>-</sup>NK.1<sup>-</sup>),  
347 monocytes (CD11b<sup>+</sup>Ly6C<sup>hi</sup>Ly6G<sup>-</sup>), and neutrophils (CD11b<sup>+</sup>Ly6C<sup>+</sup>Ly6G<sup>+</sup>) of peripheral  
348 blood mononuclear cells (PBMCs) from ZBTB38 WT and KO mice were quantified by  
349 flow cytometry. Mean ± SEM are shown; each symbol represents an individual mouse.  
350 Statistical significance was determined by unpaired student's 2-tailed t-test; n.s.  
351 indicates no significance (p > 0.05).

352           To assess if mature hematopoietic lineages require ZBTB38 for their  
353 development or maintenance, we analyzed the frequencies of different peripheral blood  
354 mononuclear cell (PBMCs) populations. We observed no differences between ZBTB38  
355 WT and KO mice in the frequencies of B cells (B220<sup>+</sup>), NK cells (NK1.1<sup>+</sup>), T (CD4<sup>+</sup> or  
356 CD8<sup>+</sup> B220<sup>-</sup>NK1.1<sup>-</sup>CD11b<sup>-</sup>), monocytes (CD11b<sup>+</sup>Ly6C<sup>hi</sup>Ly6G<sup>-</sup>), or neutrophils  
357 (CD11b<sup>+</sup>Ly6C<sup>+</sup>Ly6G<sup>+</sup>) (**Figure 6B**). Thus, ZBTB38 is not required for the development  
358 or maintenance of these hematopoietic lineages.  
359  
360

361 **Discussion**

362  
363           BTB-ZF family members such as BCL-6, ZBTB32, and ZBTB20, have critical  
364 roles in different aspects of B cell responses. ZBTB38, another member of the BTB-ZF  
365 family, has been implicated in DNA damage responses and replication efficiency. This  
366 occurs through repression of MCM10 expression, and potentially binding of other  
367 methylated CpG sites throughout the genome [18, 20]. Replication fidelity and DNA  
368 damage responses are key processes during germinal center reactions, as B cells  
369 accumulate somatic mutations and undergo dsDNA breaks as part of immunoglobulin  
370 isotype switching [42]. Yet our data demonstrate that ZBTB38 is dispensable for both  
371 primary and recall B cell responses to model T-dependent antigens despite high levels  
372 of expression in both germinal center B cells and antibody-secreting plasma cells.  
373 ZBTB38 is also dispensable for maintaining homeostasis of lymphoid and myeloid  
374 hematopoietic lineages. Thus, the evolutionary and functional reasons why ZBTB38 is  
375 expressed in the hematopoietic and immune system are not fully resolved. Instead, the  
376 most important roles for ZBTB38 may lie in other cell types, tissues, and/or  
377 physiological contexts.

378           Genome-wide association studies in humans have identified single nucleotide  
379 polymorphisms (SNPs) in ZBTB38 that are associated with shorter stature in Chinese  
380 populations but taller stature in Korean populations [34-36, 43]. However, when *Zbtb38*  
381 *f/f* mice were crossed to CMV-Cre expressing mice, germline deletion of ZBTB38 did  
382 not result in observable differences in the length or weight of the mice (data not shown).  
383 Further characterization of how SNPs influence ZBTB38 function, and identifying the

384 location of SNPs, may provide further explanation of why certain polymorphisms are  
385 associated with altered height.

386 ZBTB38 deletion or knockdown has resulted in impaired cellular processes in  
387 neuronal injuries or tumors. For instance, increasing ZBTB38 expression reduces  
388 apoptosis and promotes autophagy in a spinal cord injury model, and results in  
389 increased neuronal repair [25, 44, 45]. In contrast, ZBTB38 expression has been  
390 shown to promote proliferation and differentiation of a neuroblastoma cell line [46].  
391 These differences in the functional roles of ZBTB38 may be attributed to subtype-  
392 specific sensitivity of neurons to oxidative stress [47]. ZBTB38, along with USP9X, a  
393 deubiquitinase, is required to limit basal reactive oxidative species (ROS) levels and the  
394 response to oxidative stress [48]. Given the high levels of ZBTB38 expression in  
395 neurons, perhaps ZBTB38 is involved with balancing neuronal death with recovery after  
396 various challenges. Neuronal insult, such as injury, stroke, or cancer may be necessary  
397 to identify processes regulated by ZBTB38. Future studies focused on such other cell  
398 types and systems will be facilitated by the novel *Zbtb38* f/f mice that we have  
399 generated.

400

401

402 **Acknowledgments**

403 This work was supported by National Institutes of Health grant R01AI099108 (D.B.).  
404 R.W. was supported by the National Science Foundation Graduate Research  
405 Fellowship Program (DGE-1143954). The authors thank M. White in the Transgenic and  
406 Knockout Mouse Core at Washington University for assistance with microinjections.  
407 Flow cytometry experiments reported in this publication were supported by Flow  
408 Cytometry Shared Resource at the University of Arizona Cancer Center and the  
409 National Cancer Institute of the National Institutes of Health under award number  
410 P30CA023074.

411

412 **Author Contributions**

413 Conceived and designed the experiments: RW DB. Performed the experiments: RW.  
414 Analyzed the data: RW DB. Wrote the paper: RW DB.

415

416 **References**

- 417
- 418 1. De Silva NS, Klein U. Dynamics of B cells in germinal centres. *Nat Rev Immunol.*
- 419 2015;15(3):137-48. Epub 2015/02/07. doi: 10.1038/nri3804. PubMed PMID: 25656706;
- 420 PubMed Central PMCID: PMC4399774.
- 421 2. Roco JA, Mesin L, Binder SC, Nefzger C, Gonzalez-Figueroa P, Canete PF, et
- 422 al. Class-Switch Recombination Occurs Infrequently in Germinal Centers. *Immunity.*
- 423 2019;51(2):337-50 e7. Epub 2019/08/04. doi: 10.1016/j.immuni.2019.07.001. PubMed
- 424 PMID: 31375460; PubMed Central PMCID: PMC6914312.
- 425 3. Purtha WE, Tedder TF, Johnson S, Bhattacharya D, Diamond MS. Memory B
- 426 cells, but not long-lived plasma cells, possess antigen specificities for viral escape
- 427 mutants. *Journal of Experimental Medicine.* 2011;208:2599-606. Epub 2011/12/14. doi:
- 428 10.1084/jem.20110740. PubMed PMID: 22162833.
- 429 4. Chevrier S, Corcoran LM. BTB-ZF transcription factors, a growing family of
- 430 regulators of early and late B-cell development. *Immunology and cell biology.*
- 431 2014;92:481-8. doi: 10.1038/icb.2014.20. PubMed PMID: 24638067.
- 432 5. Dhordain P, Albagli O, Lin RJ, Ansieau S, Quief S, Leutz A, et al. Corepressor
- 433 SMRT binds the BTB/POZ repressing domain of the LAZ3/BCL6 oncoprotein. *Proc Natl*
- 434 *Acad Sci U S A.* 1997;94(20):10762-7. doi: 10.1073/pnas.94.20.10762. PubMed PMID:
- 435 9380707.

- 436 6. Dhordain P, Lin RJ, Quief S, Lantoine D, Kerckaert JP, Evans RM, et al. The  
437 LAZ3(BCL-6) oncoprotein recruits a SMRT/mSIN3A/histone deacetylase containing  
438 complex to mediate transcriptional repression. *Nucleic Acids Res.* 1998;26(20):4645-51.  
439 doi: 10.1093/nar/26.20.4645. PubMed PMID: 9753732.
- 440 7. Hong SH, David G, Wong CW, Dejean A, Privalsky ML. SMRT corepressor  
441 interacts with PLZF and with the PML-retinoic acid receptor alpha (RARalpha) and  
442 PLZF-RARalpha oncoproteins associated with acute promyelocytic leukemia. *Proc Natl*  
443 *Acad Sci U S A.* 1997;94(17):9028-33. doi: 10.1073/pnas.94.17.9028. PubMed PMID:  
444 9256429.
- 445 8. Wong C-W, Privalsky ML. Components of the SMRT Corepressor Complex  
446 Exhibit Distinctive Interactions with the POZ Domain Oncoproteins PLZF, PLZF-RAR $\alpha$ ,  
447 and BCL-6. *Journal of Biological Chemistry.* 1998;273(42):27695-702.
- 448 9. Ye BH, Cattoretti G, Shen Q, Zhang J, Hawe N, Waard Rd, et al. The BCL-6  
449 proto-oncogene controls germinal-centre formation and Th2-type inflammation. *Nature*  
450 *Genetics.* 1997;16(2):161-70. doi: 10.1038/ng0697-161.
- 451 10. Wang Y, Bhattacharya D. Adjuvant-specific regulation of long-term antibody  
452 responses by ZBTB20. *The Journal of Experimental Medicine.* 2014;211(5):841. doi:  
453 10.1084/jem.20131821.
- 454 11. Chevrier S, Emslie D, Shi W, Kratina T, Wellard C, Karnowski A, et al. The BTB-  
455 ZF transcription factor Zbtb20 is driven by Irf4 to promote plasma cell differentiation and

- 456 longevity. *The Journal of Experimental Medicine*. 2014;211(5):827. doi:  
457 10.1084/jem.20131831.
- 458 12. Jash A, Wang Y, Weisel FJ, Scharer CD, Boss JM, Shlomchik MJ, et al. ZBTB32  
459 Restricts the Duration of Memory B Cell Recall Responses. *J Immunol*. 2016;197:1159-  
460 68. Epub 2016/07/01. doi: 10.4049/jimmunol.1600882. PubMed PMID: 27357154.
- 461 13. Jash A, Zhou YW, Gerardo DK, Ripperger TJ, Parikh BA, Piersma S, et al.  
462 ZBTB32 restrains antibody responses to murine cytomegalovirus infections, but not  
463 other repetitive challenges. *Scientific Reports*. 2019;9(1):15257. doi: 10.1038/s41598-  
464 019-51860-z.
- 465 14. Ocskó T, Tóth DM, Hoffmann G, Tubak V, Glant TT, Rauch TA. Transcription  
466 factor Zbtb38 downregulates the expression of anti-inflammatory IL1r2 in mouse model  
467 of rheumatoid arthritis. *Biochimica et Biophysica Acta (BBA) - Gene Regulatory  
468 Mechanisms*. 2018;1861(11):1040-7. doi: <https://doi.org/10.1016/j.bbagr.2018.09.007>.
- 469 15. Filion GJP, Zhenilo S, Salozhin S, Yamada D, Prokhortchouk E, Defossez P-A. A  
470 family of human zinc finger proteins that bind methylated DNA and repress transcription.  
471 *Molecular and cellular biology*. 2006;26:169-81. doi: 10.1128/MCB.26.1.169-181.2006.  
472 PubMed PMID: 16354688.
- 473 16. Sasai N, Matsuda E, Sarashina E, Ishida Y, Kawaichi M. Identification of a novel  
474 BTB-zinc finger transcriptional repressor, CIBZ, that interacts with CtBP corepressor.



- 475 Genes to cells : devoted to molecular & cellular mechanisms. 2005;10:871-85. doi:  
476 10.1111/j.1365-2443.2005.00885.x. PubMed PMID: 16115196.
- 477 17. Sasai N, Nakao M, Defossez P-A. Sequence-specific recognition of methylated  
478 DNA by human zinc-finger proteins. *Nucleic Acids Res.* 2010;38(15):5015-22. doi:  
479 10.1093/nar/gkq280.
- 480 18. Hudson NO, Whitby FG, Buck-Koehntop BA. Structural insights into methylated  
481 DNA recognition by the C-terminal zinc fingers of the DNA reader protein ZBTB38. *J*  
482 *Biol Chem.* 2018;293(51):19835-43. Epub 2018/10/26. doi: 10.1074/jbc.RA118.005147.  
483 PubMed PMID: 30355731; PubMed Central PMCID: PMC6314133.
- 484 19. de Dieuleveult M, Miotto B. DNA Methylation and Chromatin: Role(s) of Methyl-  
485 CpG-Binding Protein ZBTB38. *Epigenet Insights.* 2018;11:2516865718811117. Epub  
486 2018/11/28. doi: 10.1177/2516865718811117. PubMed PMID: 30480223; PubMed  
487 Central PMCID: PMC6243405.
- 488 20. Miotto B, Chibi M, Xie P, Koundrioukoff S, Moolman-Smook H, Pugh D, et al. The  
489 RBBP6/ZBTB38/MCM10 axis regulates DNA replication and common fragile site  
490 stability. *Cell reports.* 2014;7:575-87. doi: 10.1016/j.celrep.2014.03.030. PubMed PMID:  
491 24726359.
- 492 21. Oikawa Y, Omori R, Nishii T, Ishida Y, Kawaichi M, Matsuda E. The methyl-CpG-  
493 binding protein CIBZ suppresses myogenic differentiation by directly inhibiting myogenin

494 expression. Cell research. 2011;21:1578-90. doi: 10.1038/cr.2011.90. PubMed PMID:  
495 21625269.

496 22. Nishii T, Oikawa Y, Ishida Y, Kawaichi M, Matsuda E. CtBP-interacting BTB zinc  
497 finger protein (CIBZ) promotes proliferation and G1/S transition in embryonic stem cells  
498 via Nanog. The Journal of biological chemistry. 2012;287:12417-24. doi:  
499 10.1074/jbc.M111.333856. PubMed PMID: 22315219.

500 23. Kotoku T, Kosaka K, Nishio M, Ishida Y, Kawaichi M, Matsuda E. CIBZ  
501 Regulates Mesodermal and Cardiac Differentiation of by Suppressing T and Mesp1  
502 Expression in Mouse Embryonic Stem Cells. Scientific reports. 2016;6:34188-. doi:  
503 10.1038/srep34188. PubMed PMID: 27659197.

504 24. Oikawa Y, Matsuda E, Nishii T, Ishida Y, Kawaichi M. Down-regulation of CIBZ, a  
505 novel substrate of caspase-3, induces apoptosis. The Journal of biological chemistry.  
506 2008;283:14242-7. doi: 10.1074/jbc.M802257200. PubMed PMID: 18375381.

507 25. Cai Y, Li J, Yang S, Li P, Zhang X, Liu H. CIBZ, a novel BTB domain-containing  
508 protein, is involved in mouse spinal cord injury via mitochondrial pathway independent  
509 of p53 gene. PloS one. 2012;7:e33156. doi: 10.1371/journal.pone.0033156. PubMed  
510 PMID: 22427977.

511 26. Chou C, Pinto AK, Curtis JD, Persaud SP, Cella M, Lin C-C, et al. c-Myc-induced  
512 transcription factor AP4 is required for host protection mediated by CD8+ T cells. Nature

513 immunology. 2014;15(9):884-93. Epub 2014/07/13. doi: 10.1038/ni.2943. PubMed  
514 PMID: 25029552.

515 27. Kim D, Paggi JM, Park C, Bennett C, Salzberg SL. Graph-based genome  
516 alignment and genotyping with HISAT2 and HISAT-genotype. Nat Biotechnol.  
517 2019;37(8):907-15. Epub 2019/08/04. doi: 10.1038/s41587-019-0201-4. PubMed PMID:  
518 31375807.

519 28. Thorvaldsdottir H, Robinson JT, Mesirov JP. Integrative Genomics Viewer (IGV):  
520 high-performance genomics data visualization and exploration. Brief Bioinform.  
521 2013;14(2):178-92. Epub 2012/04/21. doi: 10.1093/bib/bbs017. PubMed PMID:  
522 22517427; PubMed Central PMCID: PMC3603213.

523 29. Patro R, Duggal G, Love MI, Irizarry RA, Kingsford C. Salmon provides fast and  
524 bias-aware quantification of transcript expression. Nat Methods. 2017;14(4):417-9.  
525 Epub 2017/03/07. doi: 10.1038/nmeth.4197. PubMed PMID: 28263959; PubMed  
526 Central PMCID: PMC5600148.

527 30. Love MI, Huber W, Anders S. Moderated estimation of fold change and  
528 dispersion for RNA-seq data with DESeq2. Genome Biol. 2014;15(12):550. Epub  
529 2014/12/18. doi: 10.1186/s13059-014-0550-8. PubMed PMID: 25516281; PubMed  
530 Central PMCID: PMC4302049.

531 31. Shi W, Liao Y, Willis SN, Taubenheim N, Inouye M, Tarlinton DM, et al.  
532 Transcriptional profiling of mouse B cell terminal differentiation defines a signature for

- 533 antibody-secreting plasma cells. *Nature Immunology*. 2015;16(6):663-73. doi:  
534 10.1038/ni.3154.
- 535 32. Heng TS, Painter MW, Immunological Genome Project C. The Immunological  
536 Genome Project: networks of gene expression in immune cells. *Nat Immunol*.  
537 2008;9(10):1091-4. Epub 2008/09/19. doi: 10.1038/ni1008-1091. PubMed PMID:  
538 18800157.
- 539 33. Victora GD, Schwickert TA, Fooksman DR, Kamphorst AO, Meyer-Hermann M,  
540 Dustin ML, et al. Germinal center dynamics revealed by multiphoton microscopy with a  
541 photoactivatable fluorescent reporter. *Cell*. 2010;143(4):592-605. Epub 2010/11/16. doi:  
542 10.1016/j.cell.2010.10.032. PubMed PMID: 21074050; PubMed Central PMCID:  
543 PMCPMC3035939.
- 544 34. Gudbjartsson DF, Walters GB, Thorleifsson G, Stefansson H, Halldorsson BV,  
545 Zusmanovich P, et al. Many sequence variants affecting diversity of adult human height.  
546 *Nature Genetics*. 2008;40(5):609-15. doi: 10.1038/ng.122.
- 547 35. Kim J-J, Park Y-M, Baik K-H, Choi H-Y, Yang G-S, Koh I, et al. Exome  
548 sequencing and subsequent association studies identify five amino acid-altering  
549 variants influencing human height. *Human Genetics*. 2012;131(3):471-8. doi:  
550 10.1007/s00439-011-1096-4.

- 551 36. Wang Y, Wang Z-m, Teng Y-c, Shi J-x, Wang H-f, Yuan W-t, et al. An SNP of the  
552 ZBTB38 gene is associated with idiopathic short stature in the Chinese Han population.  
553 *Clinical Endocrinology*. 2013;79(3):402-8. doi: 10.1111/cen.12145.
- 554 37. Georgiades P, Ogilvy S, Duval H, Licence DR, Charnock-Jones DS, Smith SK, et  
555 al. VavCre transgenic mice: a tool for mutagenesis in hematopoietic and endothelial  
556 lineages. *Genesis*. 2002;34(4):251-6. Epub 2002/11/16. doi: 10.1002/gene.10161.  
557 PubMed PMID: 12434335.
- 558 38. Weisel FJ, Zuccarino-Catania GV, Chikina M, Shlomchik MJ. A Temporal Switch  
559 in the Germinal Center Determines Differential Output of Memory B and Plasma Cells.  
560 *Immunity*. 2016;44:116-30. doi: 10.1016/j.immuni.2015.12.004. PubMed PMID:  
561 26795247.
- 562 39. Spangrude GJ, Heimfeld S, Weissman IL. Purification and characterization of  
563 mouse hematopoietic stem cells. *Science*. 1988;241(4861):58. doi:  
564 10.1126/science.2898810.
- 565 40. Kondo M, Weissman IL, Akashi K. Identification of Clonogenic Common  
566 Lymphoid Progenitors in Mouse Bone Marrow. *Cell*. 1997;91(5):661-72. doi:  
567 10.1016/S0092-8674(00)80453-5.
- 568 41. Akashi K, Traver D, Miyamoto T, Weissman IL. A clonogenic common myeloid  
569 progenitor that gives rise to all myeloid lineages. *Nature*. 2000;404(6774):193-7. doi:  
570 10.1038/35004599.

- 571 42. Phan RT, Dalla-Favera R. The BCL6 proto-oncogene suppresses p53  
572 expression in germinal-centre B cells. *Nature*. 2004;432(7017):635-9. Epub 2004/12/04.  
573 doi: 10.1038/nature03147. PubMed PMID: 15577913.
- 574 43. Cho YS, Go MJ, Kim YJ, Heo JY, Oh JH, Ban H-J, et al. A large-scale genome-  
575 wide association study of Asian populations uncovers genetic factors influencing eight  
576 quantitative traits. *Nature Genetics*. 2009;41(5):527-34. doi: 10.1038/ng.357.
- 577 44. Cai Y, Li J, Zhang Z, Chen J, Zhu Y, Li R, et al. Zbtb38 is a novel target for spinal  
578 cord injury. *Oncotarget*. 2017;8(28).
- 579 45. Chen J, Yan L, Wang H, Zhang Z, Yu D, Xing C, et al. ZBTB38, a novel regulator  
580 of autophagy initiation targeted by RB1CC1/FIP200 in spinal cord injury. *Gene*.  
581 2018;678:8-16. doi: <https://doi.org/10.1016/j.gene.2018.07.073>.
- 582 46. Chen J, Xing C, Yan L, Wang Y, Wang H, Zhang Z, et al. Transcriptome profiling  
583 reveals the role of ZBTB38 knock-down in human neuroblastoma. *PeerJ*. 2019;7:e6352.  
584 doi: 10.7717/peerj.6352.
- 585 47. Wang X, Michaelis E. Selective neuronal vulnerability to oxidative stress in the  
586 brain. *Frontiers in Aging Neuroscience*. 2010;2(12). doi: 10.3389/fnagi.2010.00012.
- 587 48. Miotto B, Marchal C, Adelmant G, Guinot N, Xie P, Marto JA, et al. Stabilization  
588 of the methyl-CpG binding protein ZBTB38 by the deubiquitinase USP9X limits the  
589 occurrence and toxicity of oxidative stress in human cells. *Nucleic Acids Res*.  
590 2018;46(9):4392-404. doi: 10.1093/nar/gky149. PubMed PMID: 29490077.

591 **Supporting Information**

592

593 **S1 Figure. Gating strategy for splenic plasma cells, light zone germinal center B**  
594 **cells, and dark zone germinal center B cells.** Flow cytometric gating strategies for  
595 NP-specific splenic plasma cell (SpPC), light zone (LZ) and dark zone (DZ) germinal  
596 center (GC) B cells shown in Figure 1B.

597

598 **S2 Figure. Gating strategy for long-lived plasma cells.** Flow cytometric gating  
599 strategy for NP-specific long-lived plasma cells (LLPCs) in the bone marrow.

600

601 **S3 Figure. Gating strategy for isotype-switched memory B cells.** Flow cytometric  
602 gating strategy for NP-specific, isotype-switched memory B cells (swlg MBCs) in the  
603 spleen. Cells were gated on CD19<sup>+</sup>GL7<sup>-</sup>.

604

605 **S4 Figure. Gating strategy for bone marrow progenitors.** Flow cytometric gating  
606 strategies for bone marrow progenitors shown in Figure 6A. HSC, hematopoietic stem  
607 cell; MPP, multi-potent progenitor; CMP, common myeloid progenitor; GMP,  
608 granulocyte monocyte progenitor; CLP, common lymphoid progenitor.

609

# Figure 1

## A.

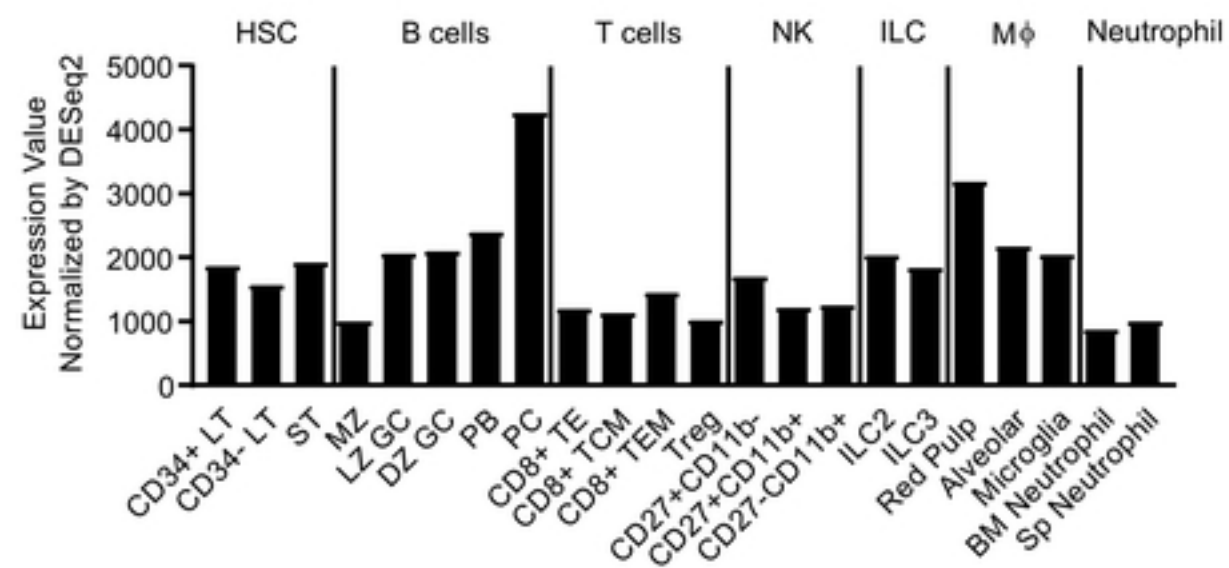

## B.

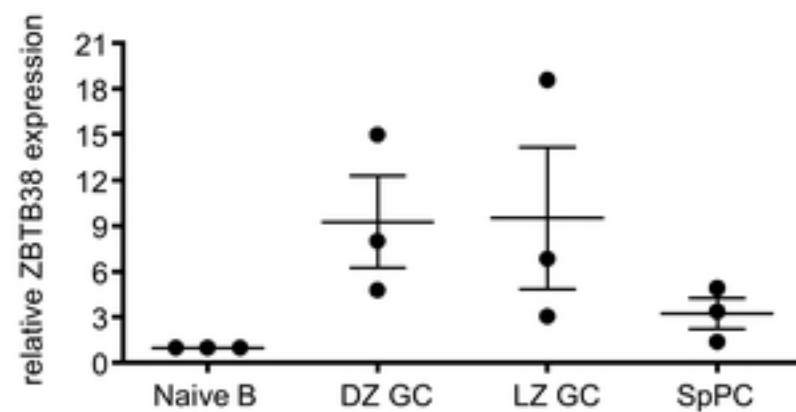

# Figure 1



# Figure 2

## A.

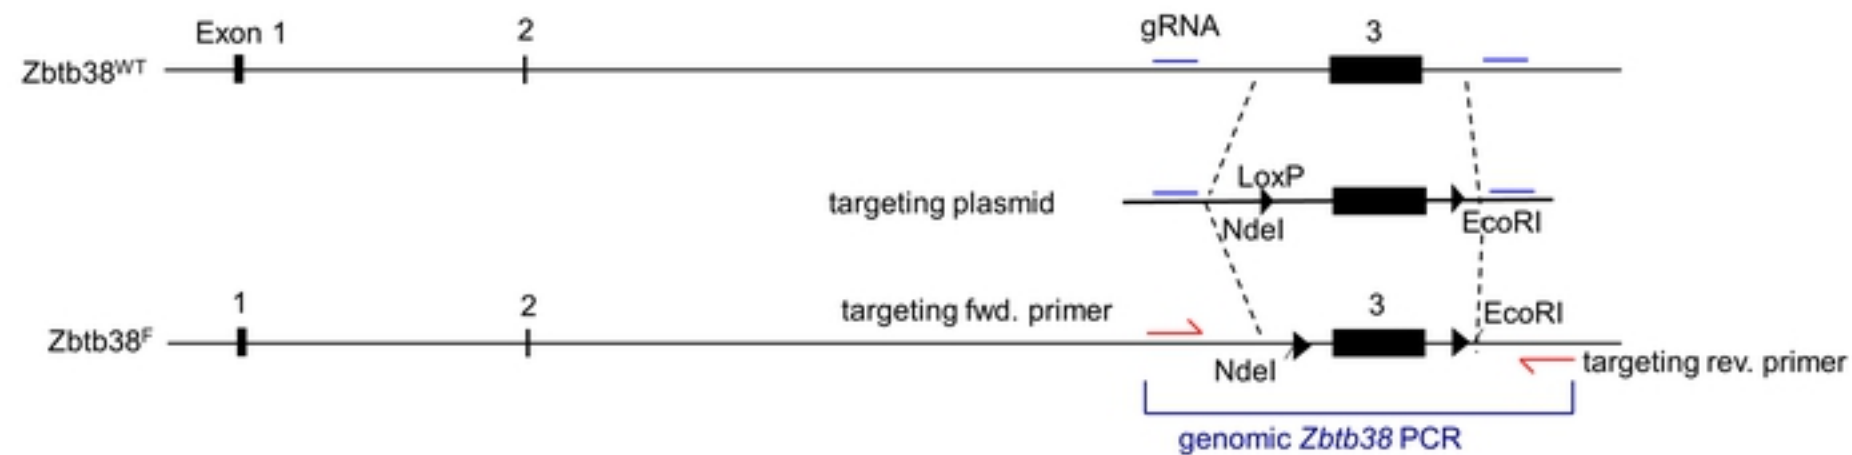

## B.

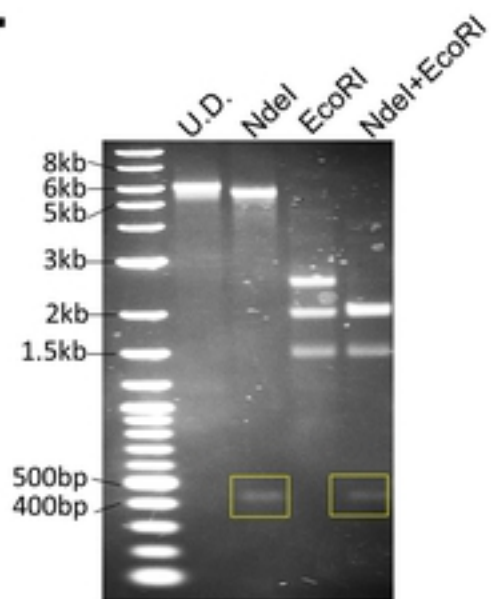

## C.

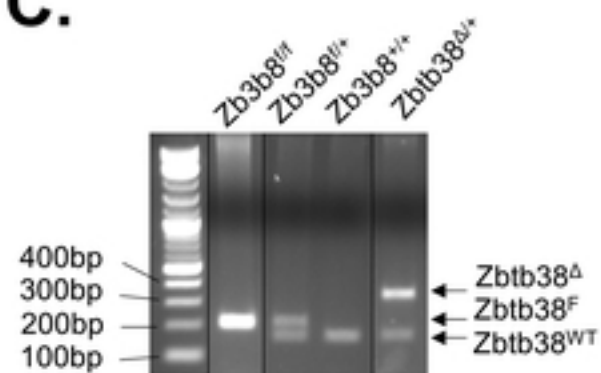

## D.

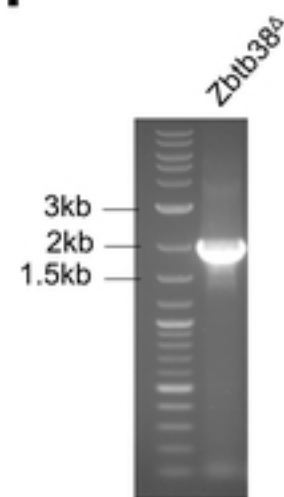

Figure 3

A.

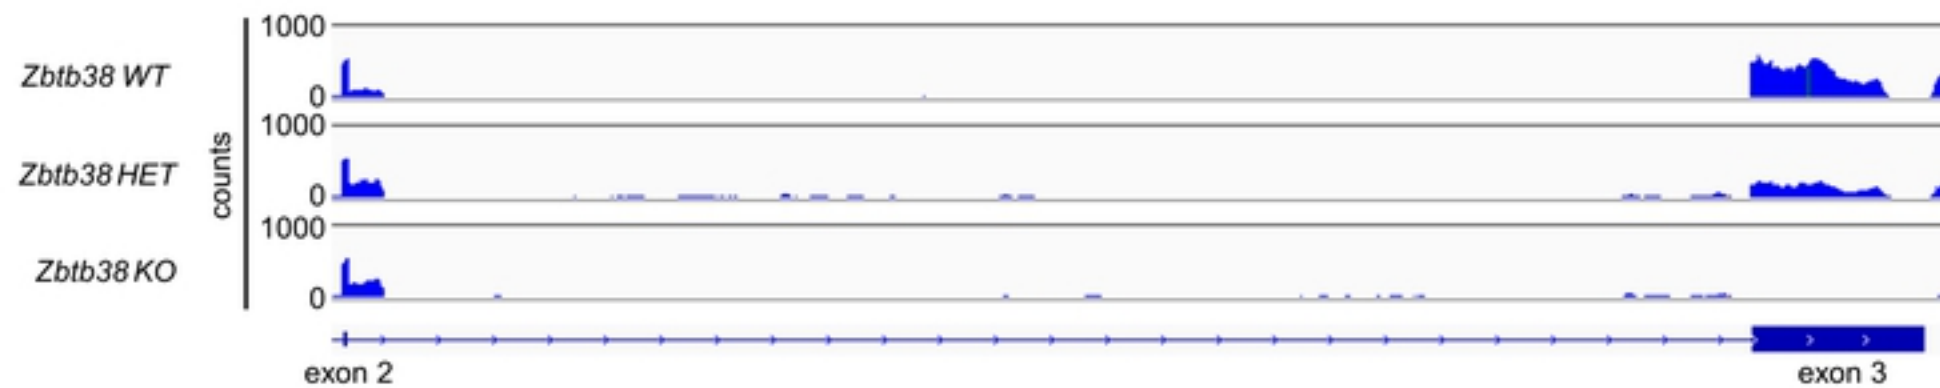

B.

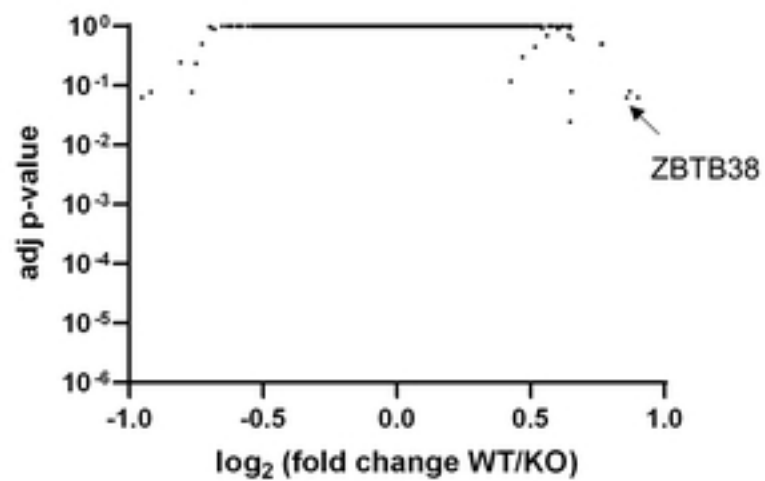

C.

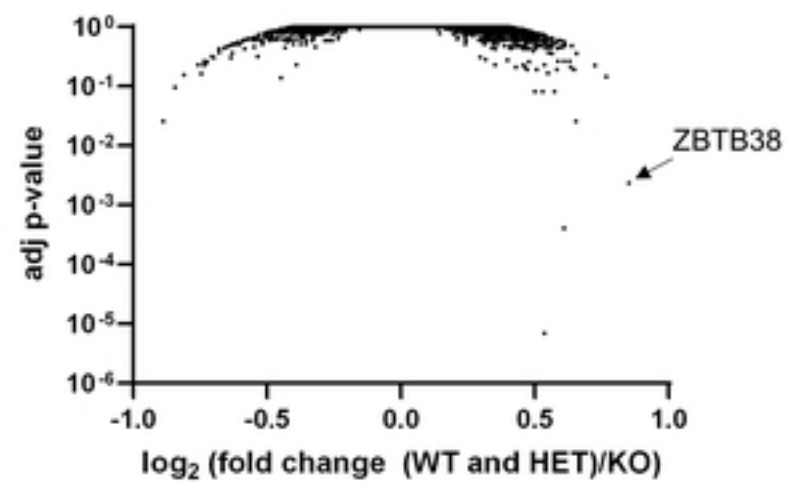

Figure 3

Figure 4

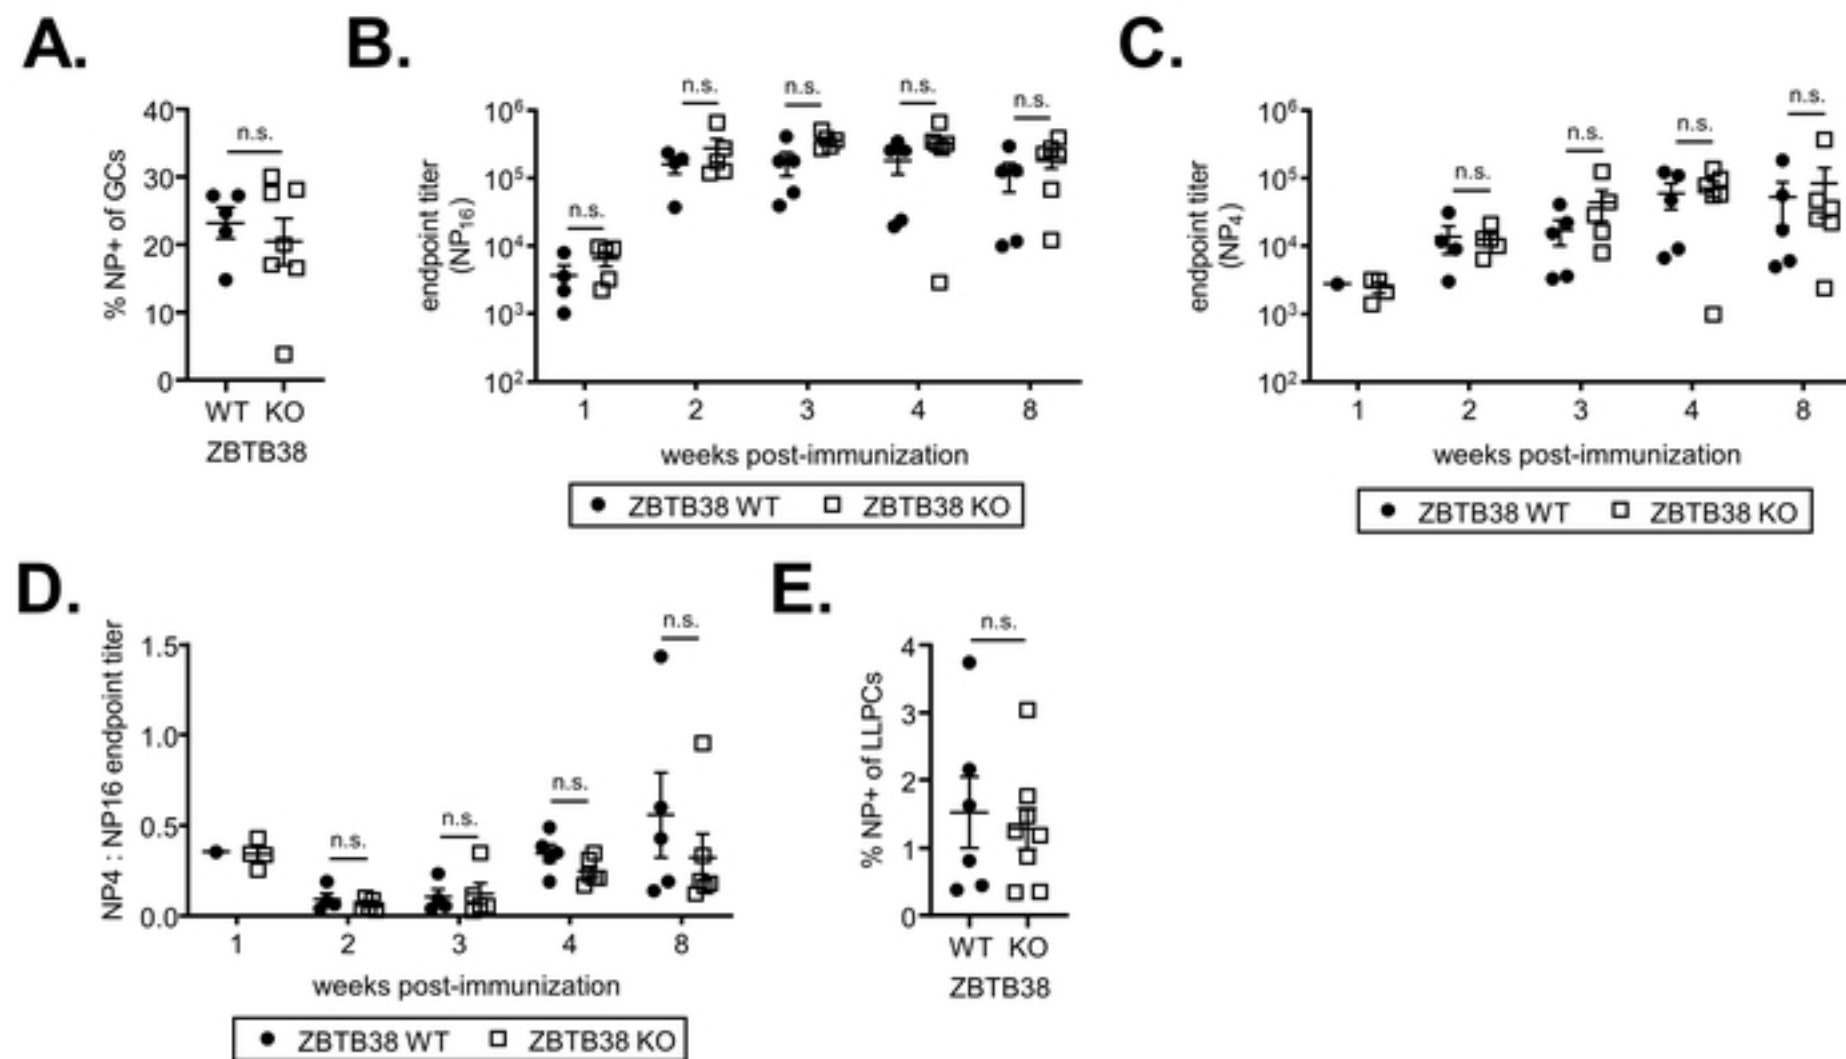

Figure 4

Figure 5

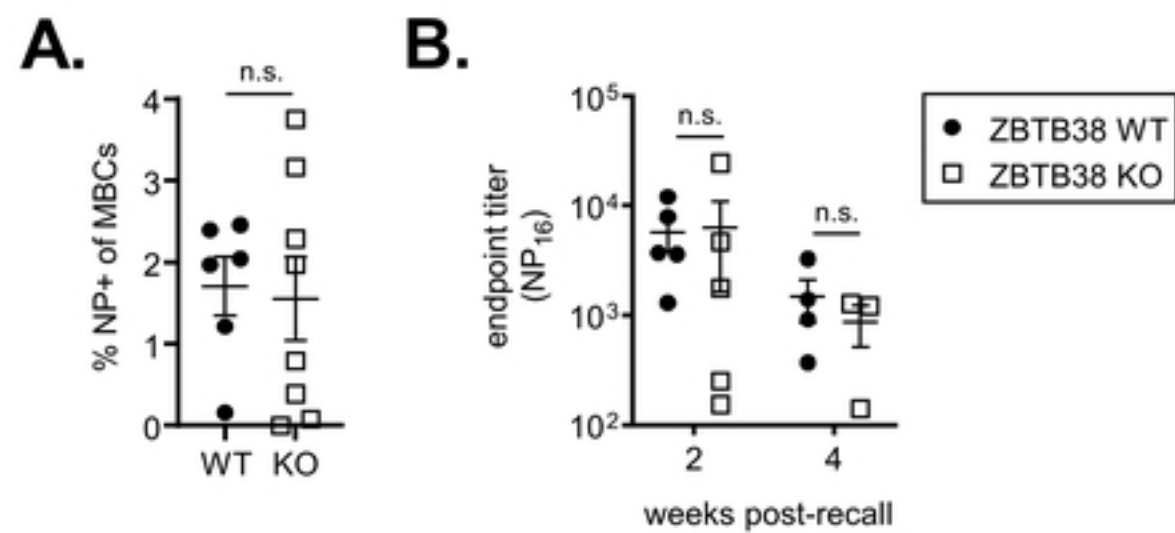

Figure 5

Figure 6

A.

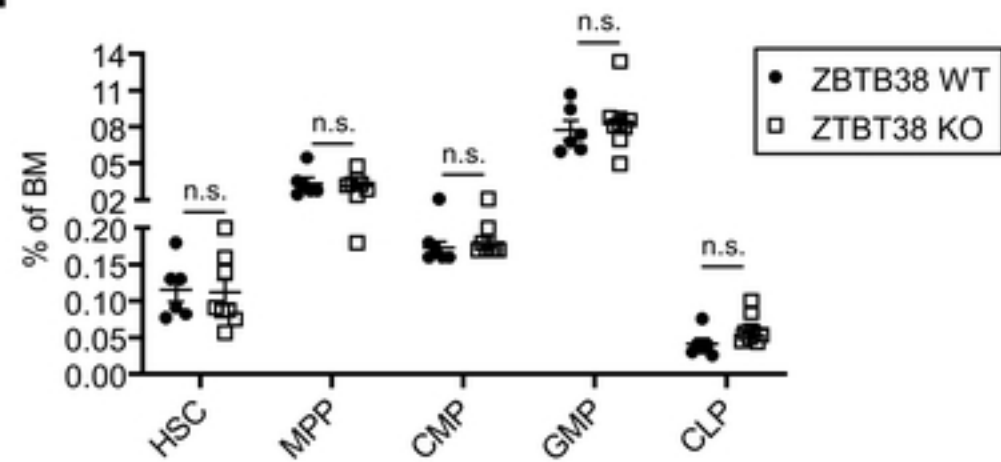

B.

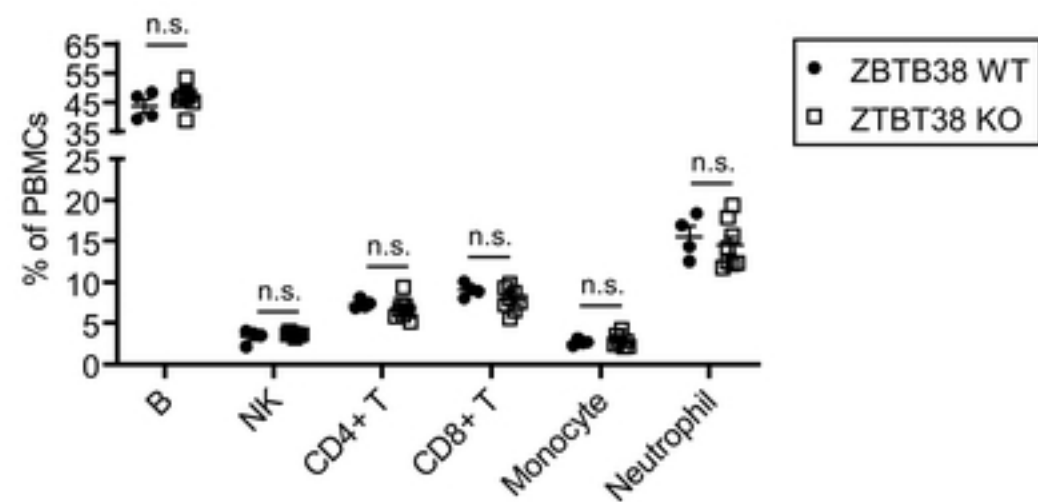

Figure 6
